# Supplementary material for: A series of Rb4Ln2(P2S6)(PS4)2 (Ln = La, Ce, Pr, Nd, Sm, Gd) rare earth thiophosphates with two distinct thiophosphate units [PVS4]3− and [PIV2S6]4−
Source: Royal Society of Chemistry journal article supplement (doi:10.1039/d0dt03718d), 2021-01-01
Supplement: d0dt03718d1.pdf [file d0dt03718d1.pdf]

**A Series of  $\text{Rb}_4\text{Ln}_2(\text{P}_2\text{S}_6)(\text{PS}_4)_2$  (Ln = La, Ce, Pr, Nd, Sm, Gd) Rare Earth Thiophosphates  
with Two Distinct Thiophosphate Units  $[\text{P}^{\text{V}}\text{S}_4]^{3-}$  and  $[\text{P}^{\text{IV}}_2\text{S}_6]^{4-}$**

*Ceren Kutahyali Aslani, Logan S. Breton, Vladislav V. Klepov, and Hans-Conrad zur Loye\**

Department of Chemistry and Biochemistry, University of South Carolina, Columbia, SC 29208

## Table of Contents

|                                                                                     |    |
|-------------------------------------------------------------------------------------|----|
| 1. $\text{Rb}_4\text{Ce}_2(\text{P}_2\text{S}_6)(\text{PS}_4)_2$ PXRD pattern.....  | 3  |
| 2. $\text{Rb}_4\text{Sm}_2(\text{P}_2\text{S}_6)(\text{PS}_4)_2$ PXRD pattern.....  | 4  |
| 3. $\text{Rb}_4\text{Nd}_2(\text{P}_2\text{S}_6)(\text{PS}_4)_2$ PXRD pattern ..... | 5  |
| 4. Crystallographic Details .....                                                   | 6  |
| 5. SEM Images .....                                                                 | 10 |
| 6. Elemental Compositions.....                                                      | 11 |
| 7. EDS Spectra .....                                                                | 12 |
| 8. Effective Magnetic Moments and Weiss Constants .....                             | 15 |

## 1. $\text{Rb}_4\text{Ce}_2(\text{P}_2\text{S}_6)(\text{PS}_4)_2$ PXRD pattern

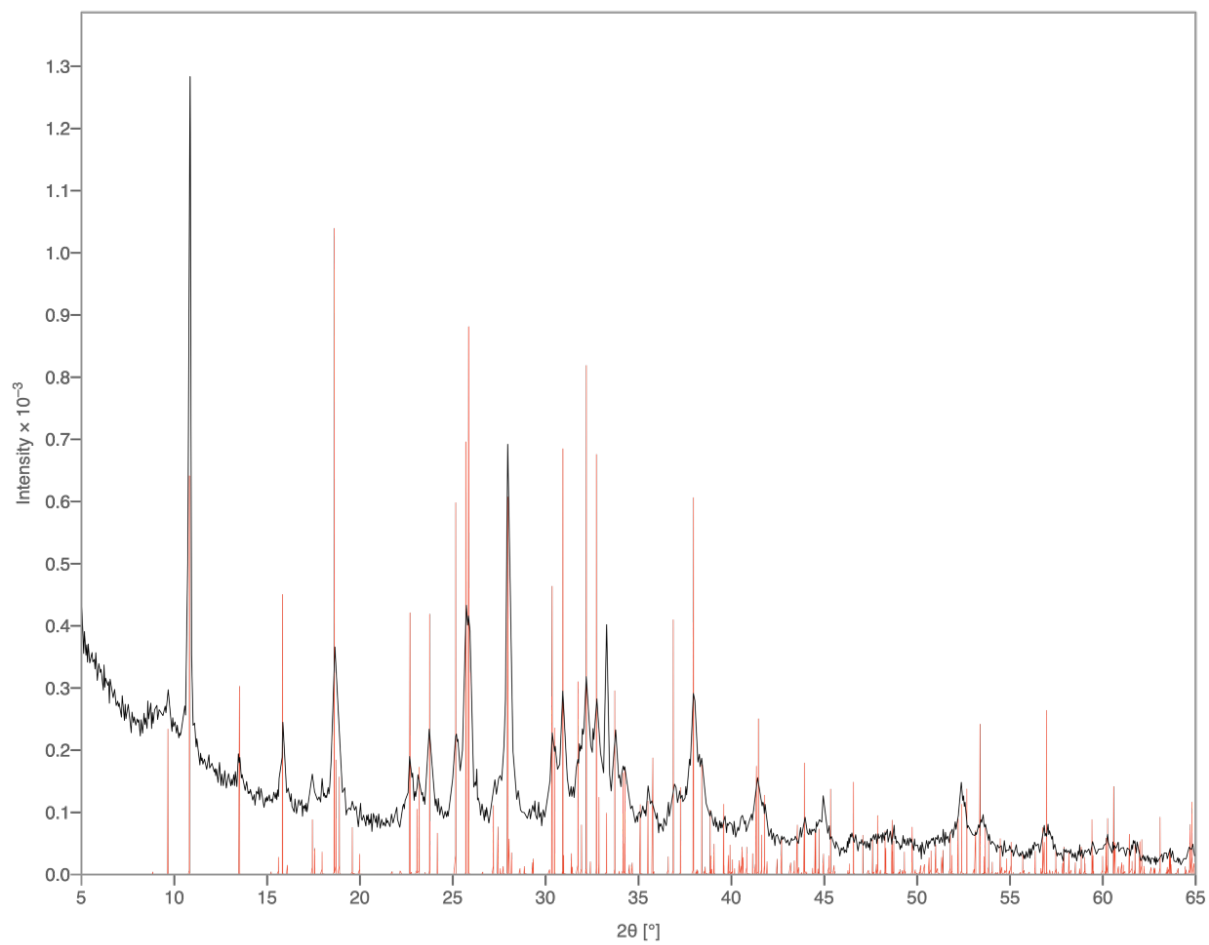

Fig S1. Experimental (black) and calculated (red) PXRD patterns of  $\text{Rb}_4\text{Ce}_2(\text{P}_2\text{S}_6)(\text{PS}_4)_2$ .

## 2. $\text{Rb}_4\text{Sm}_2(\text{P}_2\text{S}_6)(\text{PS}_4)_2$ PXRD pattern

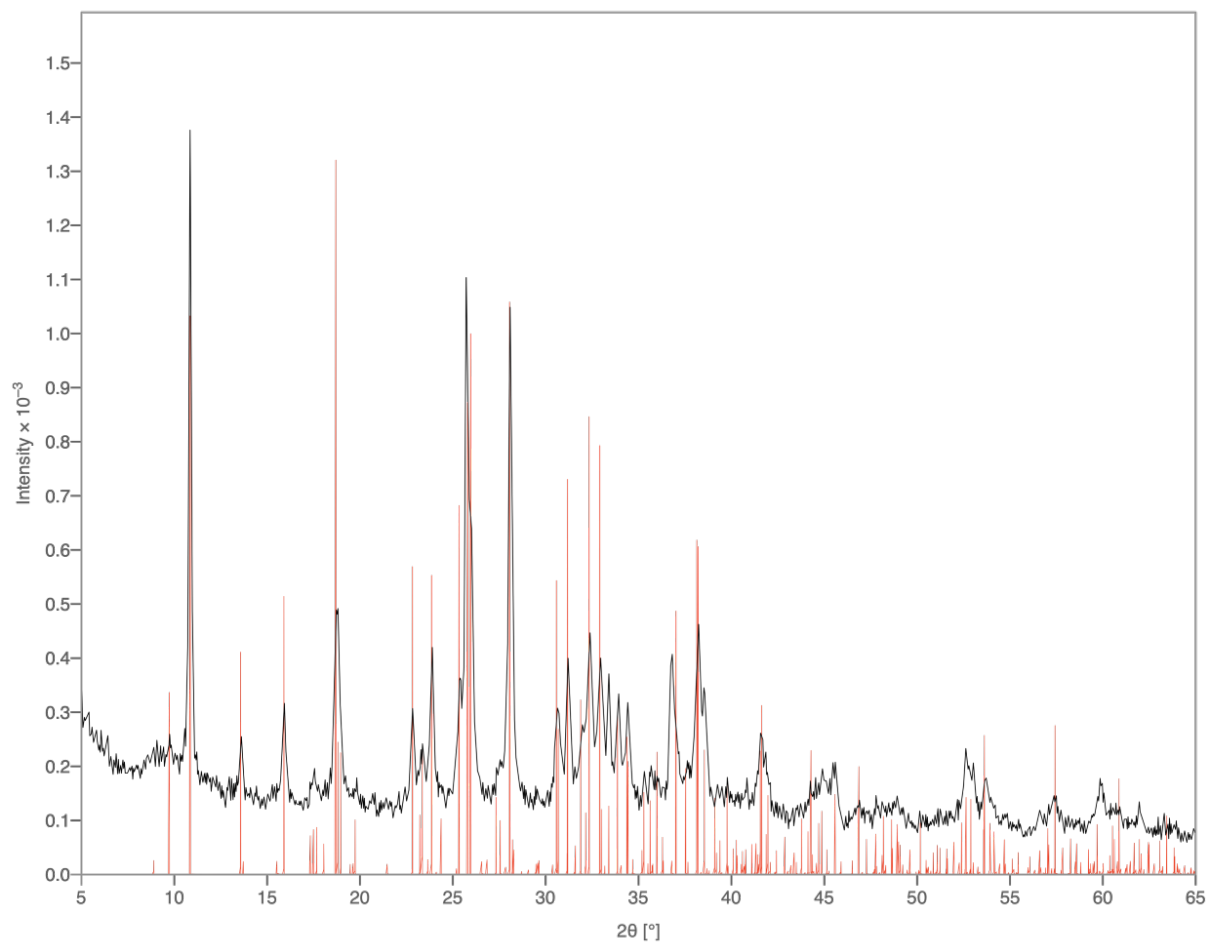

Fig S2. Experimental (black) and calculated (red) PXRD patterns of  $\text{Rb}_4\text{Sm}_2(\text{P}_2\text{S}_6)(\text{PS}_4)_2$ .

### 3. $\text{Rb}_4\text{Nd}_2(\text{P}_2\text{S}_6)(\text{PS}_4)_2$ PXRD pattern

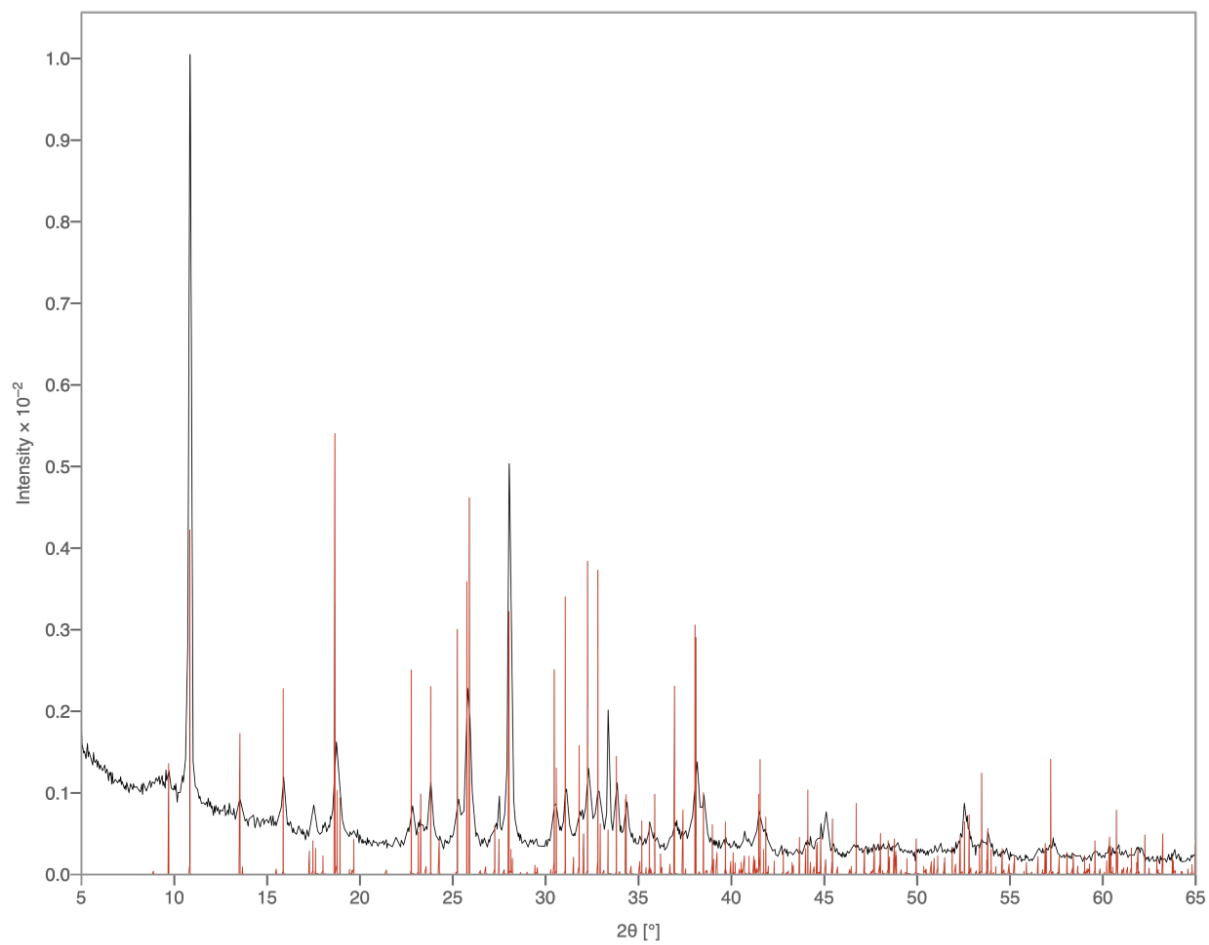

Fig S3. Experimental (black) and calculated (red) PXRD patterns of  $\text{Rb}_4\text{Nd}_2(\text{P}_2\text{S}_6)(\text{PS}_4)_2$ .

#### 4. Crystallographic Details

Table S1. Atomic coordinates ( $\times 10^4$ ) and equivalent isotropic displacement parameters ( $\text{\AA}^2 \times 10^3$ ) for  $\text{Rb}_4\text{La}_2(\text{P}_2\text{S}_6)(\text{PS}_4)_2$

| Atom | <i>x</i>  | <i>y</i>   | <i>z</i>  | $U_{\text{eq}} [\text{\AA}^2]$ |
|------|-----------|------------|-----------|--------------------------------|
| La1  | 3107.3(2) | 5192.6(2)  | 6504.8(2) | 17.18(4)                       |
| Rb1  | 6441.6(3) | 9897.5(4)  | 8021.1(2) | 36.59(8)                       |
| Rb2  | 7602.1(3) | 9954.4(4)  | 5146.9(2) | 30.06(7)                       |
| P1   | 3982.1(7) | 4840.7(9)  | 8352.4(3) | 15.83(12)                      |
| P2   | 5782.6(7) | 4959.3(9)  | 5464.7(3) | 16.55(12)                      |
| S1   | 4155.5(8) | 7290.2(9)  | 8928.5(3) | 23.87(14)                      |
| S2   | 4440.4(7) | 2530.1(9)  | 8982.3(3) | 21.99(13)                      |
| S3   | 5377.8(7) | 4959.3(10) | 7660.9(3) | 23.54(14)                      |
| S4   | 1976.4(7) | 4385.6(10) | 7832.7(3) | 22.94(13)                      |
| S5   | 5420.7(7) | 7403.9(9)  | 5994.8(4) | 22.70(14)                      |
| S6   | 7666.5(7) | 4855.6(9)  | 5126.7(3) | 22.15(13)                      |
| S7   | 5276.5(7) | 2587(9)    | 5992.3(3) | 22.48(14)                      |

Table S2. Atomic coordinates ( $\times 10^4$ ) and equivalent isotropic displacement parameters ( $\text{\AA}^2 \times 10^3$ ) for  $\text{Rb}_4\text{Ce}_2(\text{P}_2\text{S}_6)(\text{PS}_4)_2$

| Atom | <i>x</i>   | <i>y</i>   | <i>z</i>  | $U_{\text{eq}} [\text{\AA}^2]$ |
|------|------------|------------|-----------|--------------------------------|
| Ce1  | 3108.5(2)  | 5208(3)    | 6505.6(2) | 15.92(6)                       |
| Rb1  | 6434.1(5)  | 9909.6(8)  | 8017.7(3) | 35.86(11)                      |
| Rb2  | 7600.5(5)  | 9957.2(6)  | 5156(2)   | 29.31(10)                      |
| S1   | 4111.2(12) | 7295.8(15) | 8926.4(5) | 22.2(2)                        |
| S2   | 4422.1(11) | 2527.7(14) | 8982.8(5) | 20.5(2)                        |
| S3   | 5365.6(11) | 4970.1(17) | 7656.9(5) | 22.4(2)                        |
| S4   | 1965.6(11) | 4345.1(16) | 7818.5(5) | 21.1(2)                        |
| S5   | 5400(12)   | 7410.5(15) | 5998.7(6) | 22.3(2)                        |
| S6   | 7669.6(11) | 4853.3(16) | 5135.4(5) | 21.7(2)                        |
| S7   | 5251.4(12) | 2593.4(14) | 5999.3(5) | 21.6(2)                        |
| P1   | 3959.5(10) | 4841.8(14) | 8348.8(5) | 14.6(18)                       |
| P2   | 5777.2(11) | 4959.1(14) | 5469.7(5) | 15.9(18)                       |

Table S3. Atomic coordinates ( $\times 10^4$ ) and equivalent isotropic displacement parameters ( $\text{\AA}^2 \times 10^3$ ) for  $\text{Rb}_4\text{Pr}_2(\text{P}_2\text{S}_6)(\text{PS}_4)_2$

| Atom | <i>x</i>  | <i>y</i>  | <i>z</i>  | $U_{\text{eq}} [\text{\AA}^2]$ |
|------|-----------|-----------|-----------|--------------------------------|
| Pr1  | 3109(2)   | 5221.4(2) | 6506.6(2) | 15.78(3)                       |
| Rb1  | 6428.7(3) | 9915.0(4) | 8014.9(2) | 35.21(6)                       |
| Rb2  | 7600.9(3) | 9958.3(3) | 5163.5(2) | 29.48(6)                       |
| S1   | 4080.6(6) | 7295.8(7) | 8925.5(3) | 22.14(10)                      |
| S2   | 4402.7(6) | 2527.9(7) | 8985.1(3) | 20.4(10)                       |
| S3   | 5358(6)   | 4974.6(8) | 7654.9(3) | 22.21(11)                      |
| S4   | 1959.6(5) | 4315.3(8) | 7808.6(3) | 19.76(10)                      |
| S5   | 5382.7(6) | 7414.3(7) | 6000.4(3) | 21.83(10)                      |
| S6   | 7671.1(6) | 4853.8(8) | 5141.4(3) | 22.01(10)                      |
| S7   | 5233.8(6) | 2598(7)   | 6003.9(3) | 21.37(10)                      |
| P1   | 3944.6(5) | 4836.2(7) | 8346.2(3) | 14.58(9)                       |
| P2   | 5770.3(6) | 4960.9(7) | 5472.1(3) | 15.83(10)                      |

Table S4. Atomic coordinates ( $\times 10^4$ ) and equivalent isotropic displacement parameters ( $\text{\AA}^2 \times 10^3$ ) for  $\text{Rb}_4\text{Nd}_2(\text{P}_2\text{S}_6)(\text{PS}_4)_2$

| Atom | $x$       | $y$         | $z$       | $U_{\text{eq}} [\text{\AA}^2]$ |
|------|-----------|-------------|-----------|--------------------------------|
| Nd1  | 1511.3(2) | 9720.6(3)   | 2314.2(2) | 14.97(6)                       |
| Rb1  | 163.8(2)  | 4878.1(5)   | 1124.3(3) | 27.71(9)                       |
| Rb2  | 1980.2(2) | 10027.9(6)  | 276.2(2)  | 32.97(10)                      |
| P1   | 3343.6(4) | 10091.5(11) | 3636.3(5) | 12.86(15)                      |
| P2   | 473.5(4)  | 9846.7(11)  | 3121.4(5) | 14.13(15)                      |
| S1   | 2796.7(4) | 10641.2(13) | 2375.3(5) | 20.09(16)                      |
| S2   | 2655.9(4) | 9971.2(12)  | 4006.5(5) | 19.99(17)                      |
| S3   | 3983.2(4) | 12407.9(11) | 4176.6(5) | 19.32(16)                      |
| S4   | 3923.4(4) | 7634.5(12)  | 3992(5)   | 20.95(16)                      |
| S5   | 1004.7(4) | 12239.9(12) | 3140.1(5) | 19.68(16)                      |
| S6   | 146.5(5)  | 9844.8(12)  | 3912.6(5) | 20.69(17)                      |
| S7   | 1000.7(4) | 7418.7(11)  | 3156.8(5) | 19.77(16)                      |

Table S5. Atomic coordinates ( $\times 10^4$ ) and equivalent isotropic displacement parameters ( $\text{\AA}^2 \times 10^3$ ) for  $\text{Rb}_4\text{Sm}_2(\text{P}_2\text{S}_6)(\text{PS}_4)_2$

| Atom | $x$       | $y$        | $z$       | $U_{\text{eq}} [\text{\AA}^2]$ |
|------|-----------|------------|-----------|--------------------------------|
| Sm1  | 1518.2(2) | 5315.1(2)  | 7320.9(2) | 15.59(4)                       |
| Rb1  | 5174.6(2) | 5139.9(5)  | 8880.1(2) | 30.02(8)                       |
| Rb2  | 1981.3(2) | 4982.5(5)  | 5278.9(2) | 34.65(9)                       |
| S1   | 3919.9(4) | 7380.2(11) | 8961.3(5) | 20.88(16)                      |
| S2   | 3983.4(4) | 2596.4(11) | 9163.1(5) | 19.85(15)                      |
| S3   | 2654.2(4) | 5047.8(12) | 8999.2(5) | 21.85(16)                      |
| S4   | 2782.5(4) | 4350.4(11) | 7362.9(5) | 19.11(15)                      |
| S5   | 1003.6(4) | 7609.6(11) | 8141.4(5) | 21.32(16)                      |
| S6   | 1009.4(4) | 2785.5(11) | 8122.8(5) | 20.83(16)                      |
| S7   | 163.8(4)  | 5174.8(12) | 8923(5)   | 22.79(16)                      |
| P1   | 3339.8(4) | 4912(10)   | 8621.9(5) | 14.31(14)                      |
| P2   | 477.6(4)  | 5177.6(11) | 8117(5)   | 15.72(14)                      |



Table S6. Atomic coordinates ( $\times 10^4$ ) and equivalent isotropic displacement parameters ( $\text{\AA}^2 \times 10^3$ ) for  $\text{Rb}_4\text{Gd}_2(\text{P}_2\text{S}_6)(\text{PS}_4)_2$

| Atom | <i>x</i>  | <i>y</i>  | <i>z</i>  | $U_{\text{eq}} [\text{\AA}^2]$ |
|------|-----------|-----------|-----------|--------------------------------|
| Gd1  | 1527.3(2) | 5324.9(2) | 7327.9(2) | 16.14(3)                       |
| Rb1  | 5184.7(2) | 5144.6(3) | 8885.1(2) | 30.44(6)                       |
| Rb2  | 1980.7(2) | 4996.1(4) | 5278.3(2) | 35.17(6)                       |
| S1   | 3919.4(3) | 7397.5(8) | 8944.5(3) | 21.18(11)                      |
| S2   | 3984.4(3) | 2600(8)   | 9146(3)   | 20.06(10)                      |
| S3   | 2654.8(3) | 5059.8(9) | 8996.2(3) | 22.15(11)                      |
| S4   | 2773.4(3) | 4348.4(8) | 7352.7(3) | 19.25(10)                      |
| S5   | 1003.1(3) | 7619.9(8) | 8123.4(4) | 21.44(11)                      |
| S6   | 1012.2(3) | 2790.9(8) | 8106.1(4) | 21.4(11)                       |
| S7   | 181(3)    | 5173.1(9) | 8933.1(4) | 24.92(12)                      |
| P1   | 3340(3)   | 4924.1(7) | 8611.6(3) | 14.7(10)                       |
| P2   | 481.9(3)  | 5181.4(8) | 8112.7(3) | 16.51(10)                      |

## 5. SEM Images

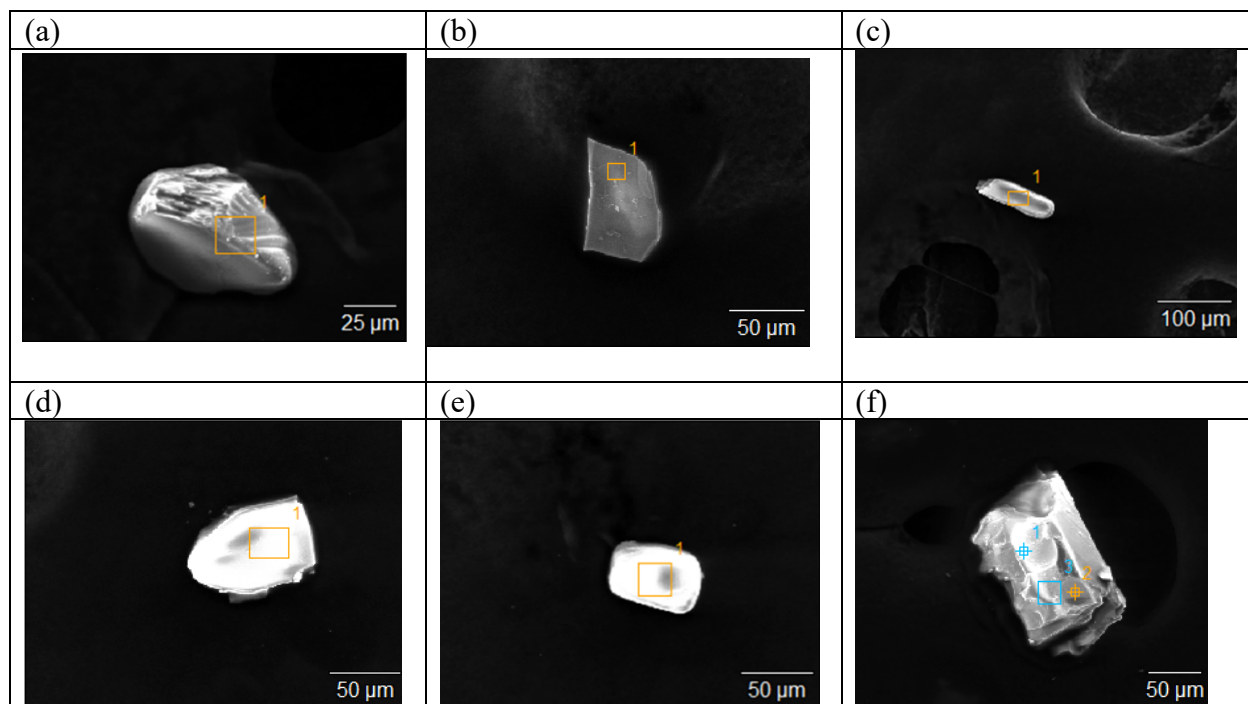

Fig S4. SEM images of single crystals of (a)  $\text{Rb}_4\text{La}_2(\text{P}_2\text{S}_6)(\text{PS}_4)_2$ , (b)  $\text{Rb}_4\text{Ce}_2(\text{P}_2\text{S}_6)(\text{PS}_4)_2$ , (c)  $\text{Rb}_4\text{Sm}_2(\text{P}_2\text{S}_6)(\text{PS}_4)_2$ , (d)  $\text{Rb}_4\text{Pr}_2(\text{P}_2\text{S}_6)(\text{PS}_4)_2$ , (e)  $\text{Rb}_4\text{Gd}_2(\text{P}_2\text{S}_6)(\text{PS}_4)_2$ , (f)  $\text{Rb}_4\text{Nd}_2(\text{P}_2\text{S}_6)(\text{PS}_4)_2$

## 6. Elemental Compositions

Table S7. Elemental Compositions of the thiophosphates determined by EDS.

|                                                               |         |                                                               |         |                                                               |         |
|---------------------------------------------------------------|---------|---------------------------------------------------------------|---------|---------------------------------------------------------------|---------|
| $\text{Rb}_4\text{La}_2(\text{P}_2\text{S}_6)(\text{PS}_4)_2$ |         | $\text{Rb}_4\text{Ce}_2(\text{P}_2\text{S}_6)(\text{PS}_4)_2$ |         | $\text{Rb}_4\text{Sm}_2(\text{P}_2\text{S}_6)(\text{PS}_4)_2$ |         |
| Element                                                       | Atom, % | Element                                                       | Atom, % | Element                                                       | Atom, % |
| P                                                             | 18.55   | P                                                             | 17.92   | P                                                             | 18.23   |
| S                                                             | 58.40   | S                                                             | 60.07   | S                                                             | 59.01   |
| Rb                                                            | 15.22   | Rb                                                            | 15.03   | Rb                                                            | 14.35   |
| La                                                            | 7.83    | Ce                                                            | 6.99    | Sm                                                            | 8.41    |
|                                                               |         |                                                               |         |                                                               |         |
| $\text{Rb}_4\text{Pr}_2(\text{P}_2\text{S}_6)(\text{PS}_4)_2$ |         | $\text{Rb}_4\text{Gd}_2(\text{P}_2\text{S}_6)(\text{PS}_4)_2$ |         | $\text{Rb}_4\text{Nd}_2(\text{P}_2\text{S}_6)(\text{PS}_4)_2$ |         |
| Element                                                       | Atom, % | Element                                                       | Atom, % | Element                                                       | Atom, % |
| P                                                             | 18.23   | P                                                             | 17.82   | P                                                             | 17.39   |
| S                                                             | 58.31   | S                                                             | 60.30   | S                                                             | 58.54   |
| Rb                                                            | 15.09   | Rb                                                            | 14.27   | Rb                                                            | 17.14   |
| Pr                                                            | 8.37    | Gd                                                            | 7.60    | Nd                                                            | 6.93    |
|                                                               |         |                                                               |         |                                                               |         |

## 7. EDS Spectra

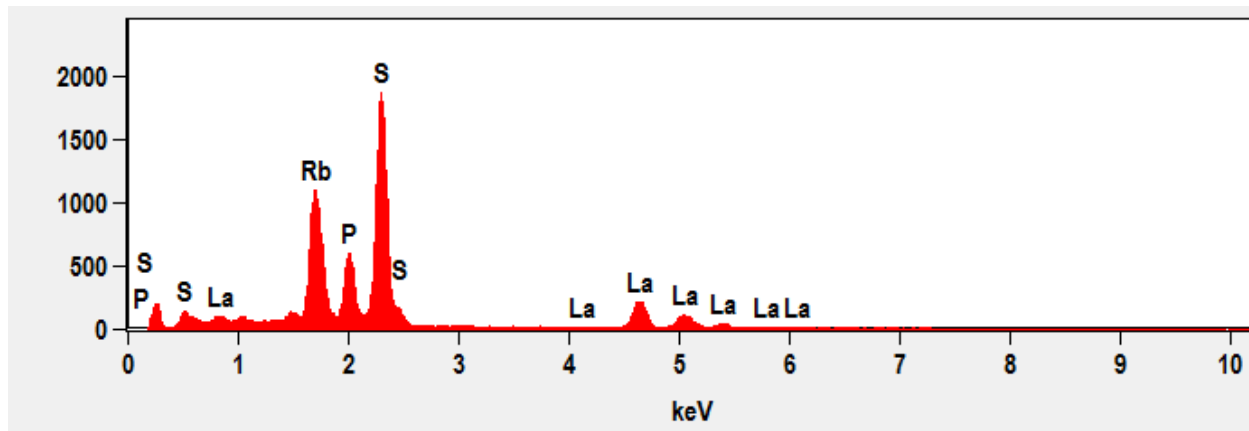

Figure S5. EDS spectrum of  $\text{Rb}_4\text{La}_2(\text{P}_2\text{S}_6)(\text{PS}_4)_2$ .

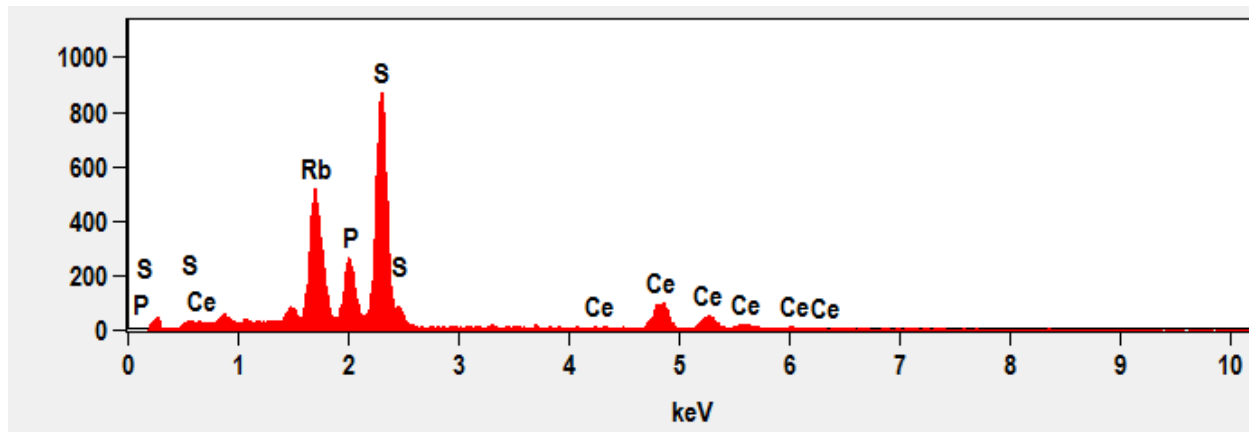

Figure S6. EDS spectrum of  $\text{Rb}_4\text{Ce}_2(\text{P}_2\text{S}_6)(\text{PS}_4)_2$ .

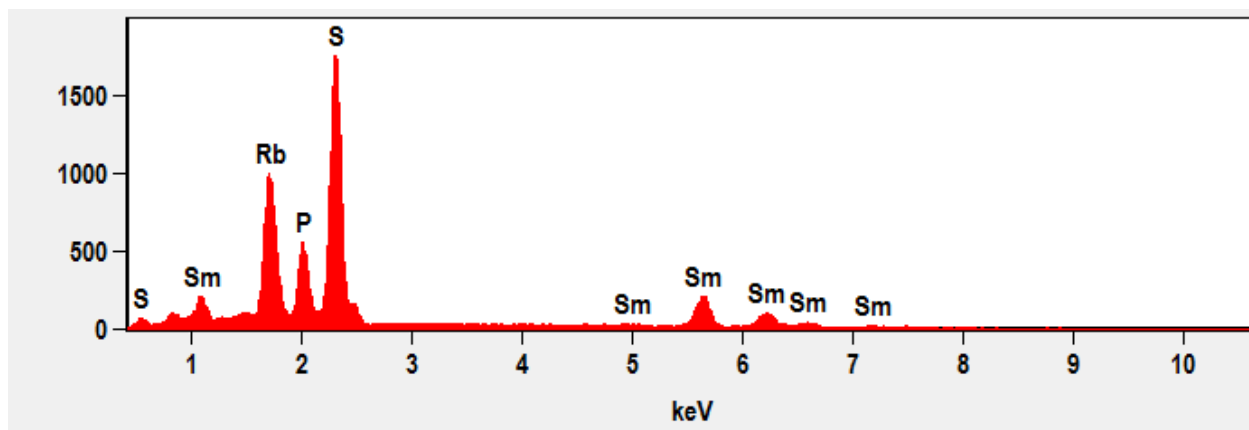

Figure S7. EDS spectrum of  $\text{Rb}_4\text{Sm}_2(\text{P}_2\text{S}_6)(\text{PS}_4)_2$ .

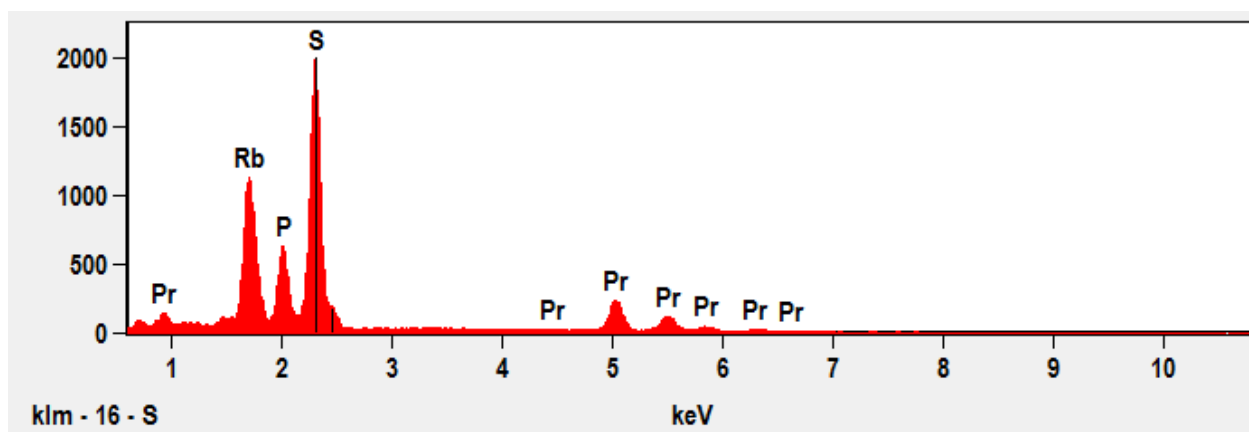

Figure S8. EDS spectrum of  $\text{Rb}_4\text{Pr}_2(\text{P}_2\text{S}_6)(\text{PS}_4)_2$ .

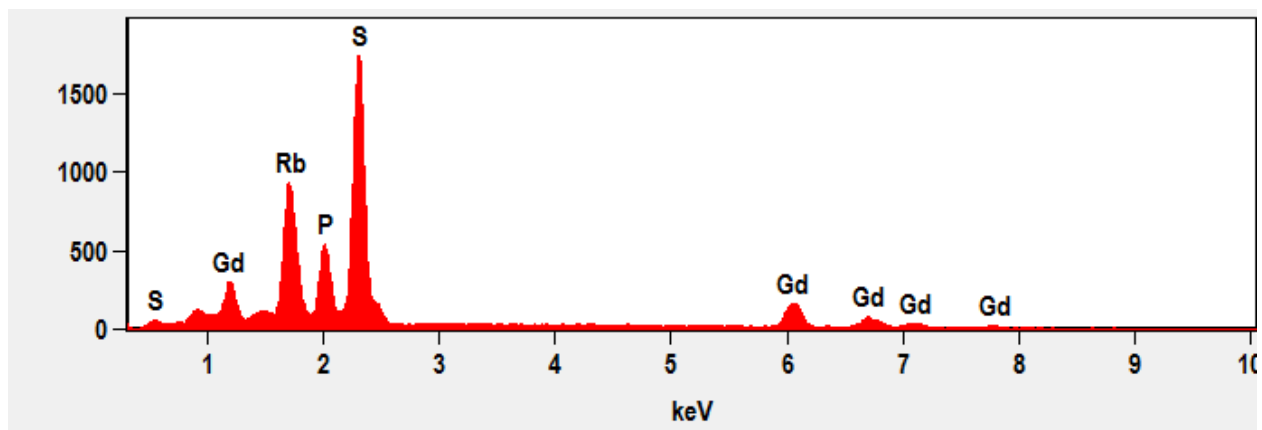

Figure S9. EDS spectrum of  $\text{Rb}_4\text{Gd}_2(\text{P}_2\text{S}_6)(\text{PS}_4)_2$ .

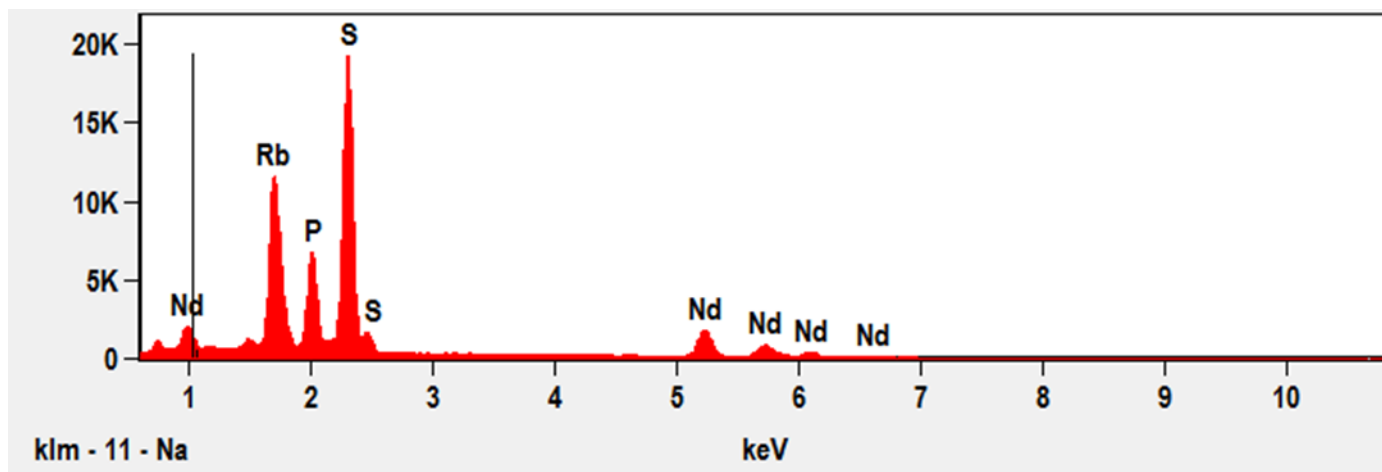

Figure S10. EDS spectrum of  $\text{Rb}_4\text{Nd}_2(\text{P}_2\text{S}_6)(\text{PS}_4)_2$ .

## 8. Effective Magnetic Moments and Weiss Constants

Table S8. Effective Magnetic Moments and Weiss Constants for Compounds of  $\text{Rb}_4\text{Nd}_2(\text{P}_2\text{S}_6)(\text{PS}_4)_2$ ,  $\text{Rb}_4\text{Ce}_2(\text{P}_2\text{S}_6)(\text{PS}_4)_2$ , and  $\text{Rb}_4\text{Sm}_2(\text{P}_2\text{S}_6)(\text{PS}_4)_2$

|                                               | $\text{Rb}_2\text{Nd}_2(\text{P}_2\text{S}_6)(\text{PS}_4)_2$ | $\text{Rb}_2\text{Ce}_2(\text{P}_2\text{S}_6)(\text{PS}_4)_2$ | $\text{Rb}_2\text{Sm}_2(\text{P}_2\text{S}_6)(\text{PS}_4)_2$ |
|-----------------------------------------------|---------------------------------------------------------------|---------------------------------------------------------------|---------------------------------------------------------------|
| $\mu_{\text{eff}}, \mu_{\text{B}}$            | 3.77                                                          | 2.66                                                          | 0.65                                                          |
| $\theta, \text{K}$                            | -28.3                                                         | -23.9                                                         | -1.1                                                          |
| Calculated $\mu_{\text{eff}}, \mu_{\text{B}}$ | 3.62                                                          | 2.54                                                          | 0.85                                                          |
